# Supplementary material
Source: MDPI journal article supplement (https://www.mdpi.com/2073-4433/10/1/34)

# Supplementary Materials

**Table S1.** Weather stations of the surface synoptic observations network (SYNOP) used in this study with their true location (latitude and longitude), their true altitude (z), and location and altitude of the model grid cell containing the location of the weather station. Light grey accounts for  $z < 100\text{m}$ , moderate grey for  $100\text{m} < z < 300\text{m}$  and dark grey for  $z > 300\text{m}$ .

| Station name       | real Latitude | real Longitude | real Altitude | MAR Latitude | MAR Longitude | MAR Altitude |
|--------------------|---------------|----------------|---------------|--------------|---------------|--------------|
| <b>Ostende</b>     | 51,20         | 2,87           | 0             | 51,20        | 2,86          | 0            |
| <b>Koksijde</b>    | 51,08         | 2,65           | 6             | 51,11        | 2,72          | 0            |
| <b>Deurne</b>      | 51,20         | 4,47           | 7             | 51,21        | 4,44          | 10           |
| <b>Gent</b>        | 51,08         | 3,70           | 8             | 51,12        | 3,73          | 6            |
| <b>Beitem</b>      | 50,90         | 3,12           | 25            | 50,93        | 3,16          | 21           |
| <b>Schaffen</b>    | 51,00         | 5,07           | 30            | 51,03        | 5,16          | 30           |
| <b>Munte</b>       | 50,94         | 3,74           | 50            | 50,94        | 3,73          | 29           |
| <b>Zaventem</b>    | 50,88         | 4,52           | 55            | 50,85        | 4,58          | 70           |
| <b>Chievres</b>    | 50,58         | 3,83           | 60            | 50,58        | 3,73          | 59           |
| <b>Uccle</b>       | 50,80         | 4,36           | 101           | 50,76        | 4,30          | 72           |
| <b>Beauvechain</b> | 50,75         | 4,77           | 102           | 50,76        | 4,73          | 96           |
| <b>Ernage</b>      | 50,59         | 4,67           | 150           | 50,58        | 4,72          | 156          |
| <b>Bierset</b>     | 50,64         | 5,41           | 170           | 50,66        | 5,44          | 149          |
| <b>Charleroi</b>   | 50,46         | 4,45           | 187           | 50,40        | 4,44          | 170          |
| <b>Florennes</b>   | 50,24         | 4,65           | 279           | 50,22        | 4,58          | 246          |
| <b>Spa</b>         | 50,48         | 5,91           | 479           | 50,48        | 6,00          | 509          |
| <b>SaintHubert</b> | 50,04         | 5,41           | 557           | 50,03        | 5,42          | 562          |
| <b>Elsenborne</b>  | 50,49         | 6,18           | 570           | 50,47        | 6,28          | 645          |
| <b>MontRigi</b>    | 50,51         | 6,07           | 673           | 50,48        | 6,14          | 673          |

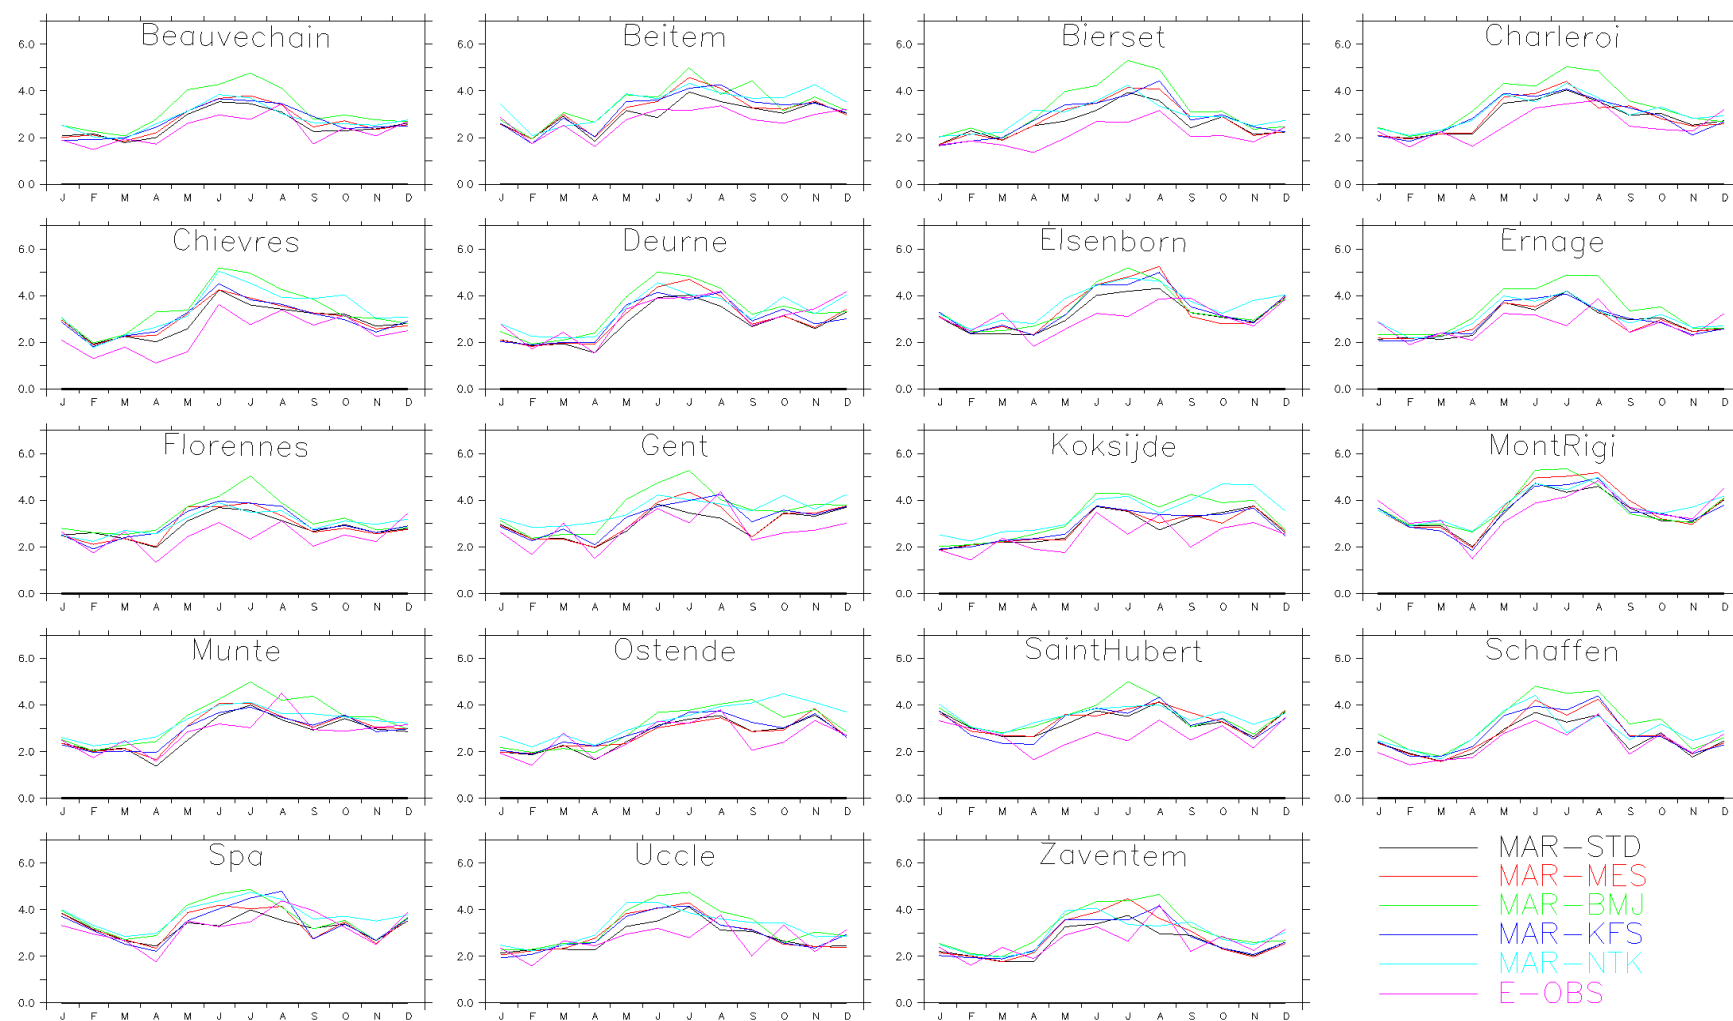

**Figure S1.** Monthly mean NRMSE (Normalized Root Mean Square Error) of daily precipitation simulated by MAR for each experiment and provided by E-OBS with respect to SYNOP observations (in mm/day).

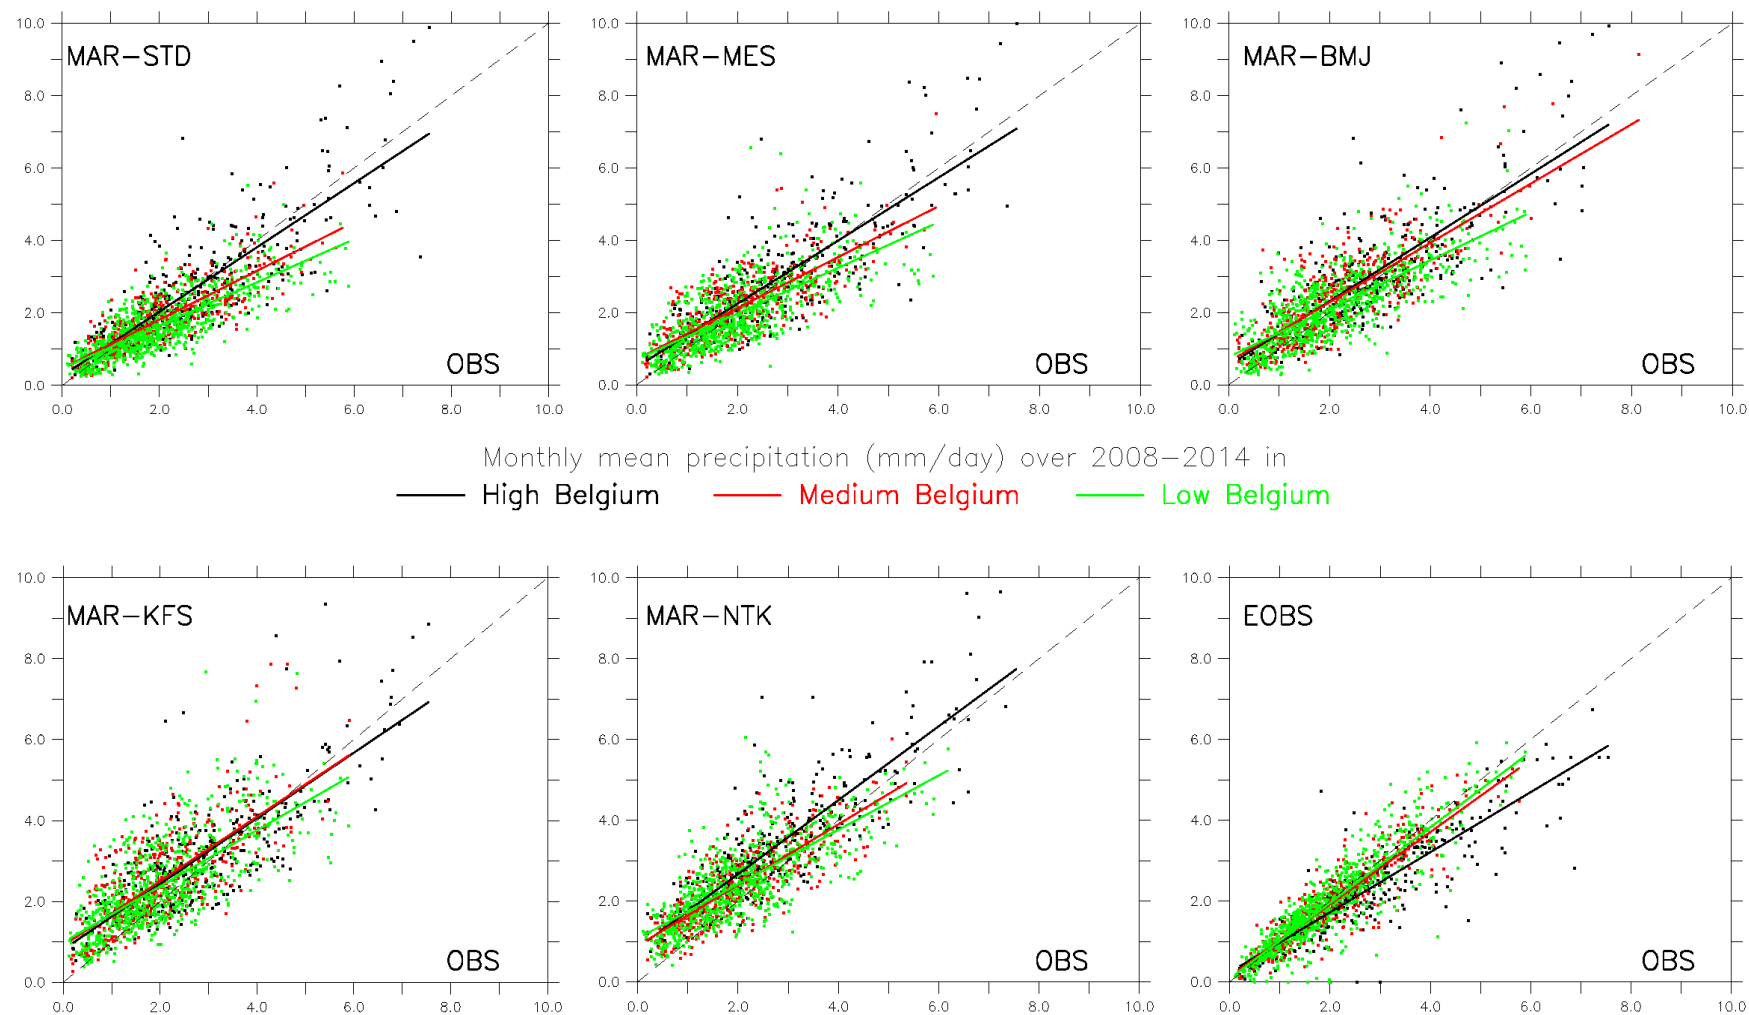

**Figure S2.** Monthly mean of daily precipitation simulated by MAR for each experiment and provided by E-OBS situated in the y-axis compared to the SYNOP observation situated in the x-axis (in mm/day).

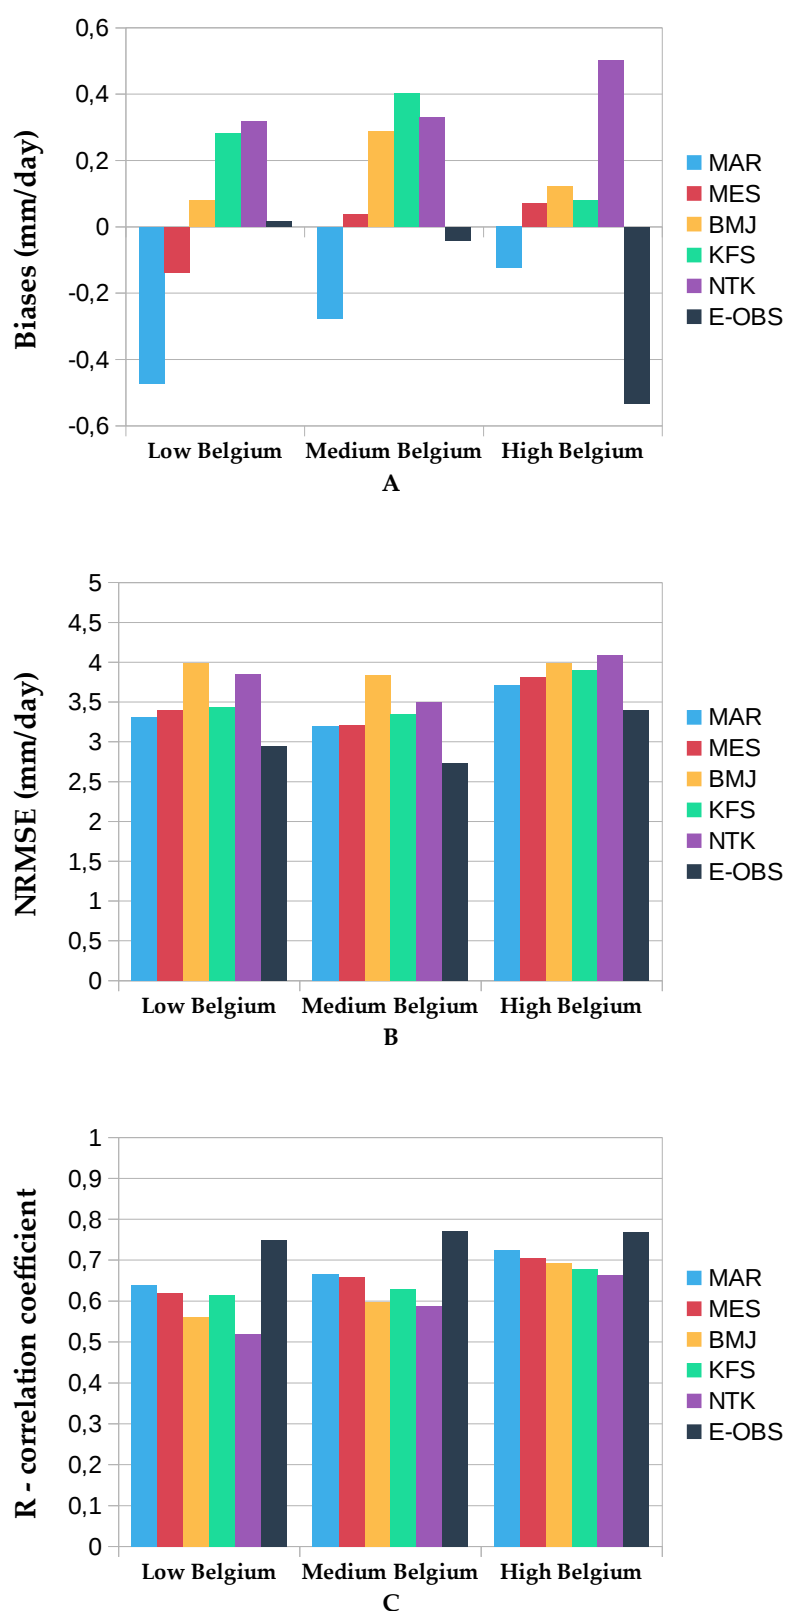

**Figure S3.** Regional averages of biases (A), NRMSE (B) and correlation coefficient (C) for each experiment and provided by E-OBS with respect to SYNOP observations.

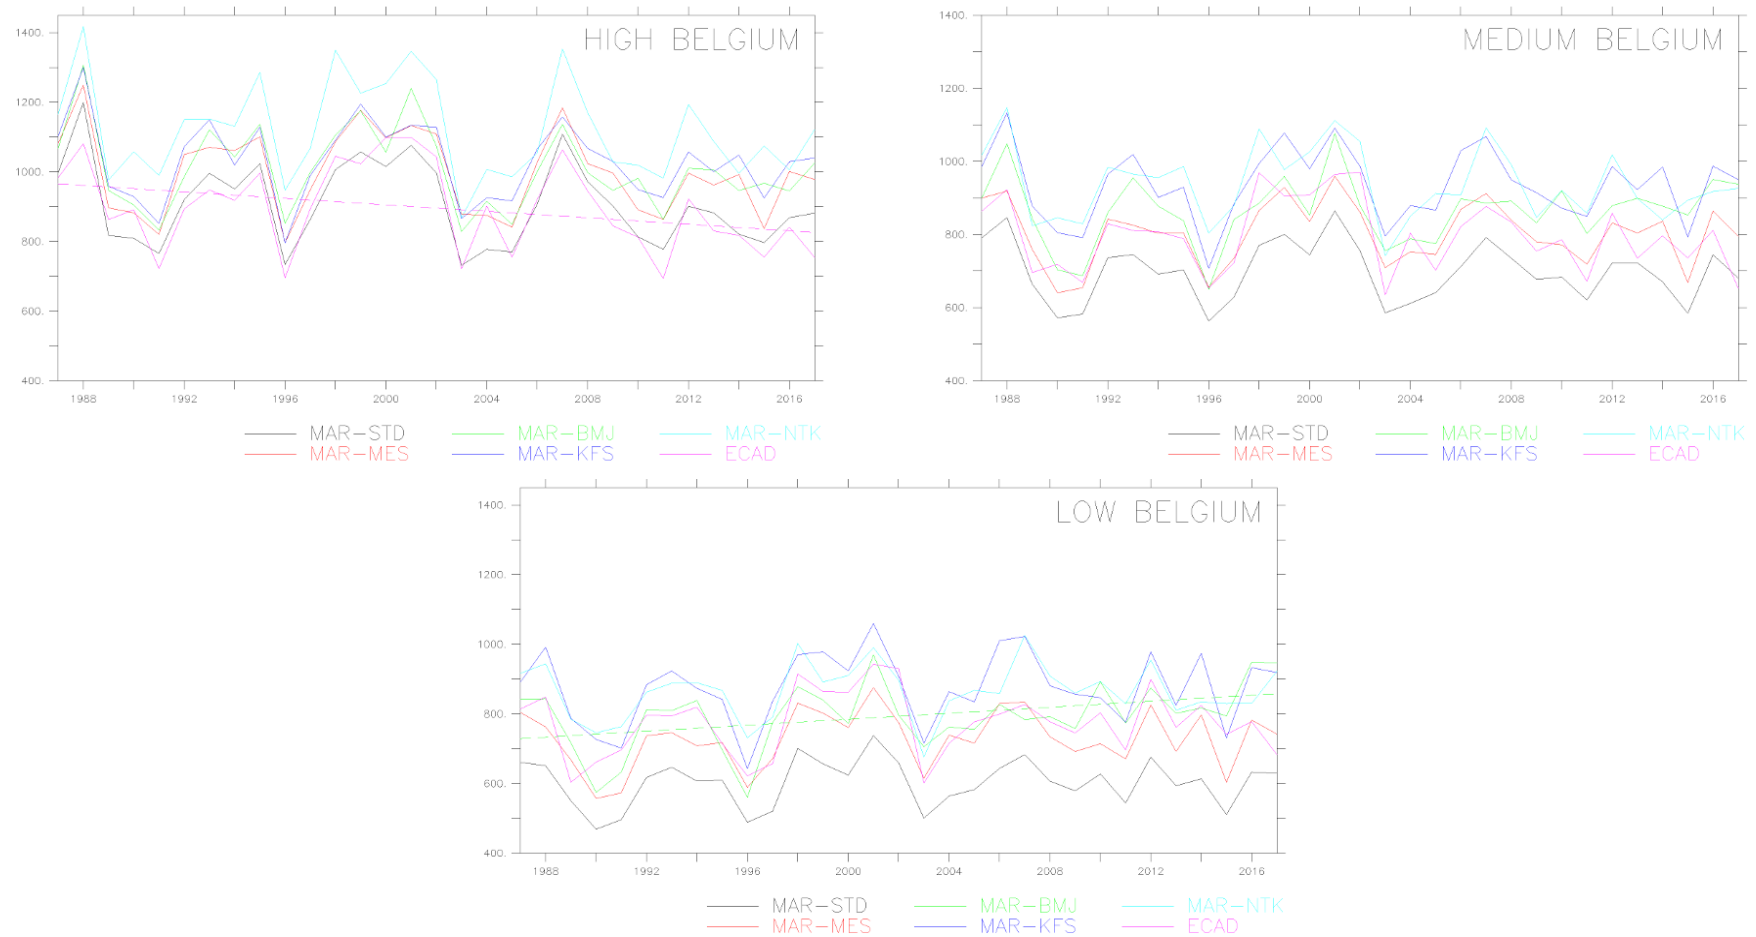

**Figure S4.** Evolution of annual precipitation in High, Medium and Low Belgium (in mm/year) simulated by MAR for each model experiment and provided by E-OBS. The significant trends are plotted in dotted lines. The delimitation of High ( $z > 300$  m), Medium ( $100 \text{ m} < z < 300$  m) and Low Belgium ( $z < 100$  m) areas are based on the MAR 10-km (resp. E-OBS  $0.22^\circ$ ) topography.

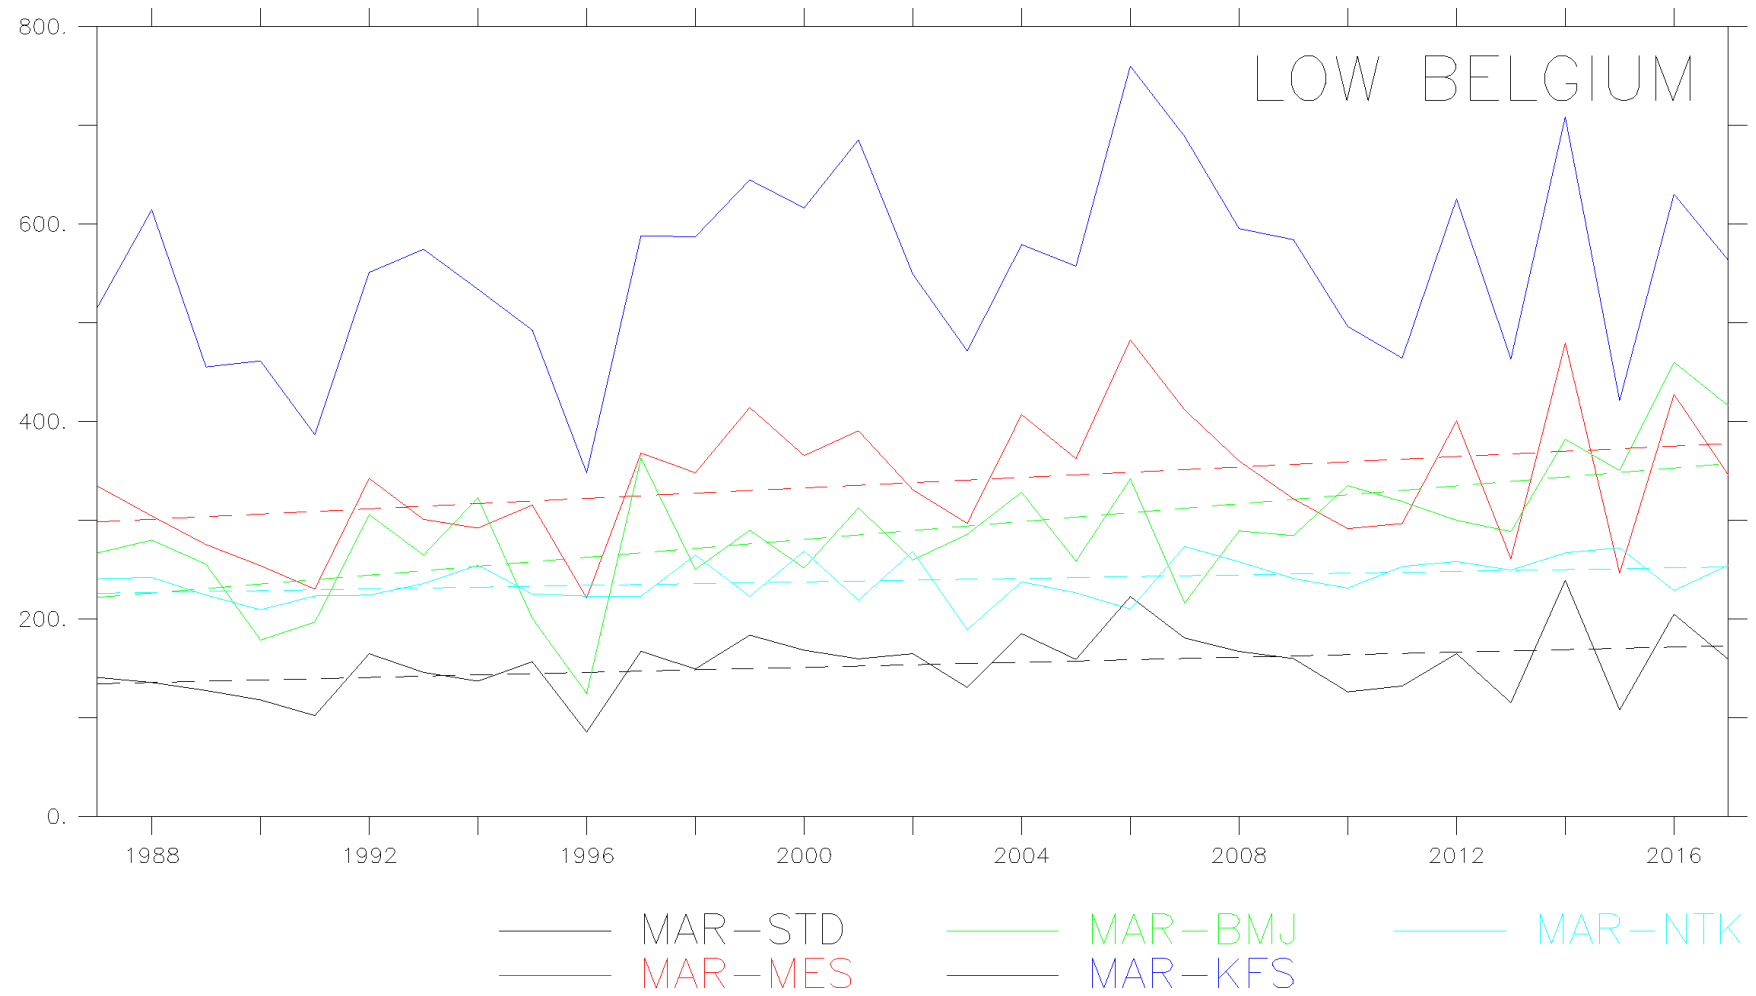

**Figure S5.** Idem as Figure S3 but for convective precipitation over Low Belgium.

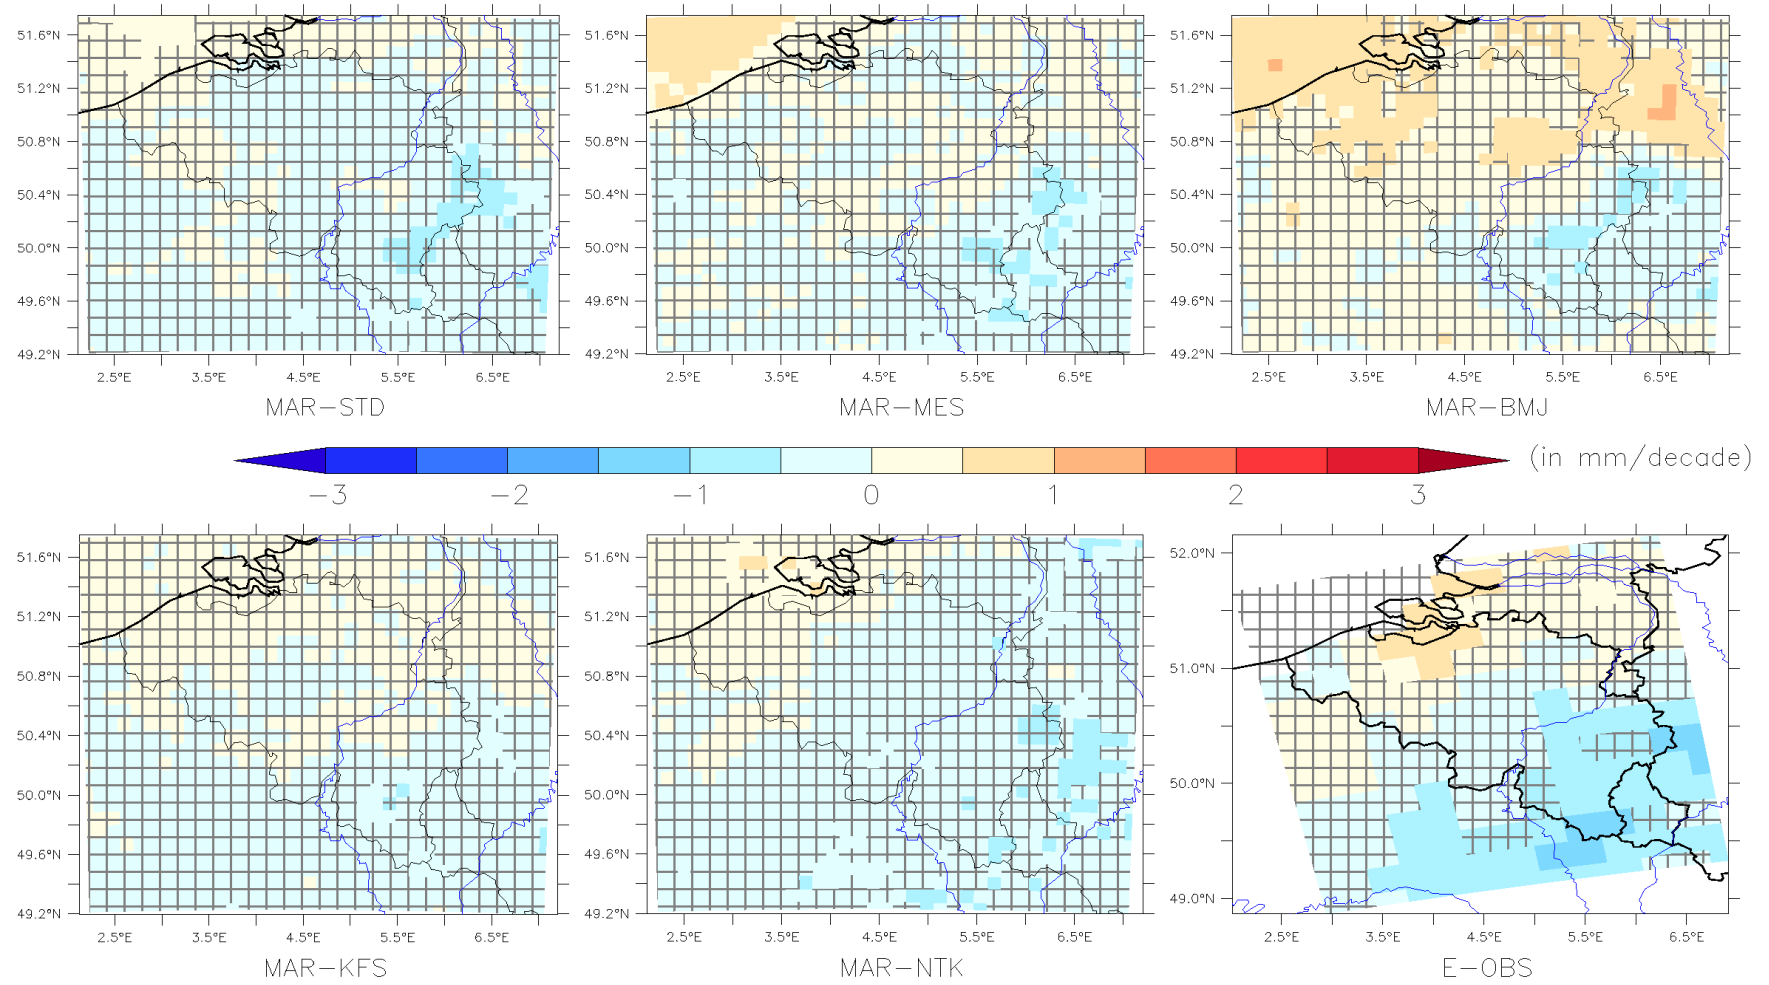

**Figure S6.** Trends over 1987-2017 of the yearly 95<sup>th</sup> percentile of daily precipitation simulated by MAR for each experiment and provided by E-OBS in mm/decade. Crosshatched pixels indicate statistically non-significant trends.

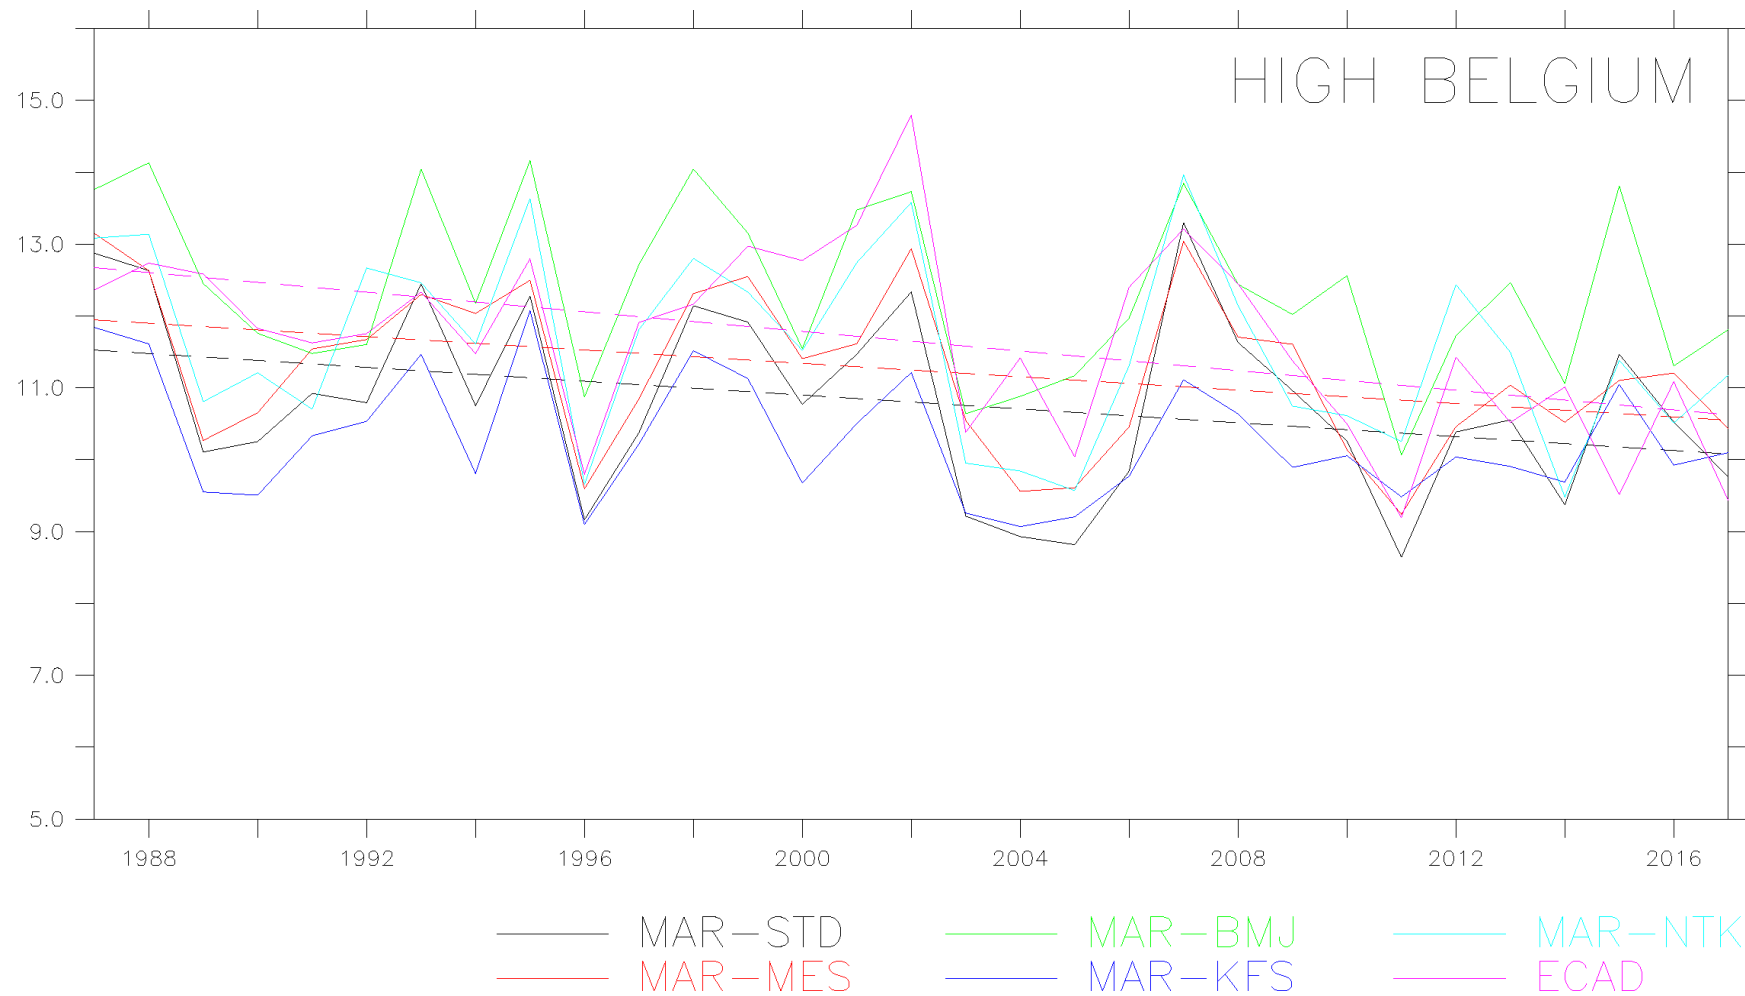

**Figure S7.** Idem as Figure S3 but for the 95<sup>th</sup> percentile of precipitation over High Belgium.

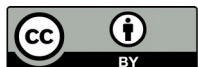

Supplement: s1 [file s1]
